# Supplementary material for: Statistical assessment of an atmospheric mercury passive sampler at a regional site in South Africa
Source: Royal Society of Chemistry journal article supplement (doi:10.1039/d4ea00071d), 2025-01-01
Supplement: d4ea00071d1.pdf [file d4ea00071d1.pdf]

ARTICLE

**Supporting Information:**

**Statistical assessment of an atmospheric mercury passive sampler at a regional site in South Africa**

Xoliswa E. V. Job,<sup>a</sup> Kerneels Jaars,<sup>\*a</sup> Pieter G. van Zyl,<sup>a</sup> Katrina MacSween,<sup>b</sup> Liezl Bredenkamp,<sup>a</sup> Miroslav Josipovic,<sup>a</sup> Lynwill G. Martin,<sup>a,c</sup> Ville Vakkari,<sup>a,d</sup> Markku Kulmala<sup>e</sup> and Lauri Laakso<sup>a,d</sup>

<sup>a</sup> Atmospheric Chemistry Research Group, Chemical Resource Beneficiation, North-West University, Potchefstroom, South Africa.

<sup>b</sup> Air Quality Research Division, Science and Technology Branch, Environment and Climate Change Canada, Toronto, Canada.

<sup>c</sup> South African Weather Service c/o CSIR, Stellenbosch, South Africa.

<sup>d</sup> Finnish Meteorological Institute, Helsinki, Finland.

<sup>e</sup> Institute for Atmospheric and Earth System Research, University of Helsinki, Helsinki, 00014, Finland.

**Supporting Information (SI) figure and table list:**

- Figure S1: Percentage of data coverage over the 14-month sampling period with the Tekran® 2537X.
- Figure S2: Error bar plot (mean±SD) comparing field blank concentrations determined in different studies utilizing mercury passive samplers. The number (N) of blanks deployed during each study is indicated at the bottom.
- Table S1: Analytical detail on the passive air samplers deployed at Welgegund.
- Table S2: Guidelines for interpreting the  $\rho$ ,  $r$ ,  $p$ -value and  $\epsilon^2$ .

ARTICLE

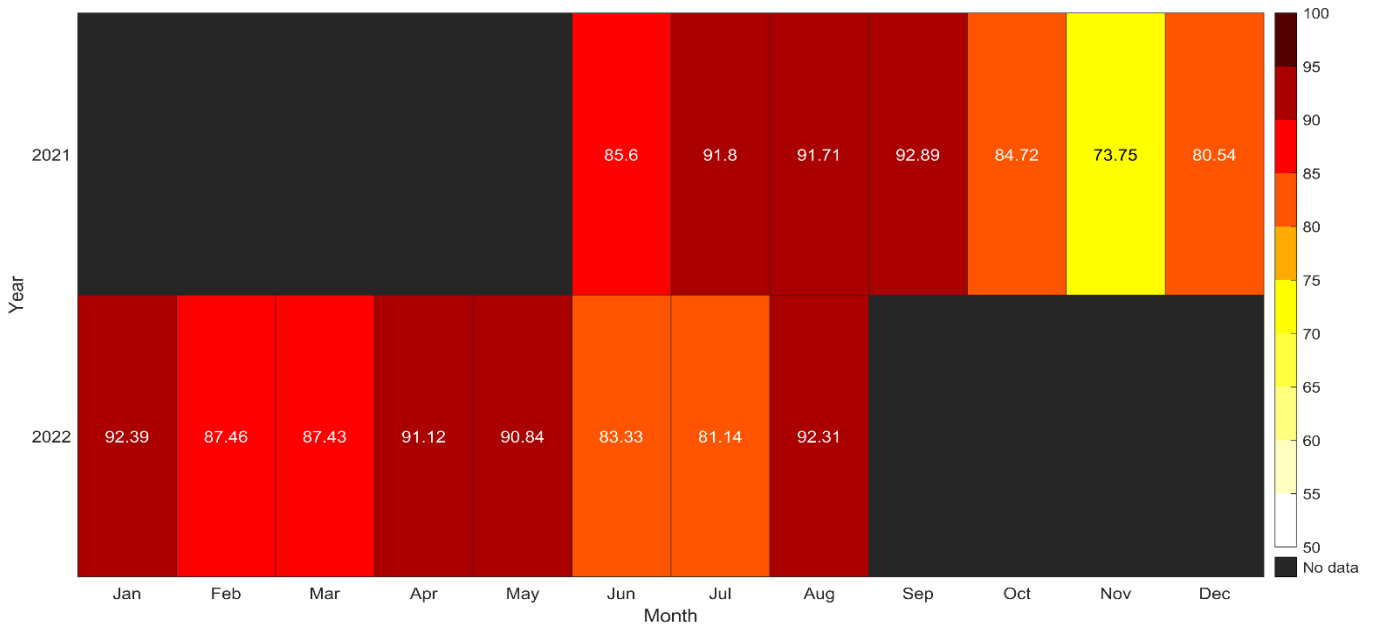

Figure S1 Percentage of data coverage over the 14-month sampling period with the Tekran® 2537X

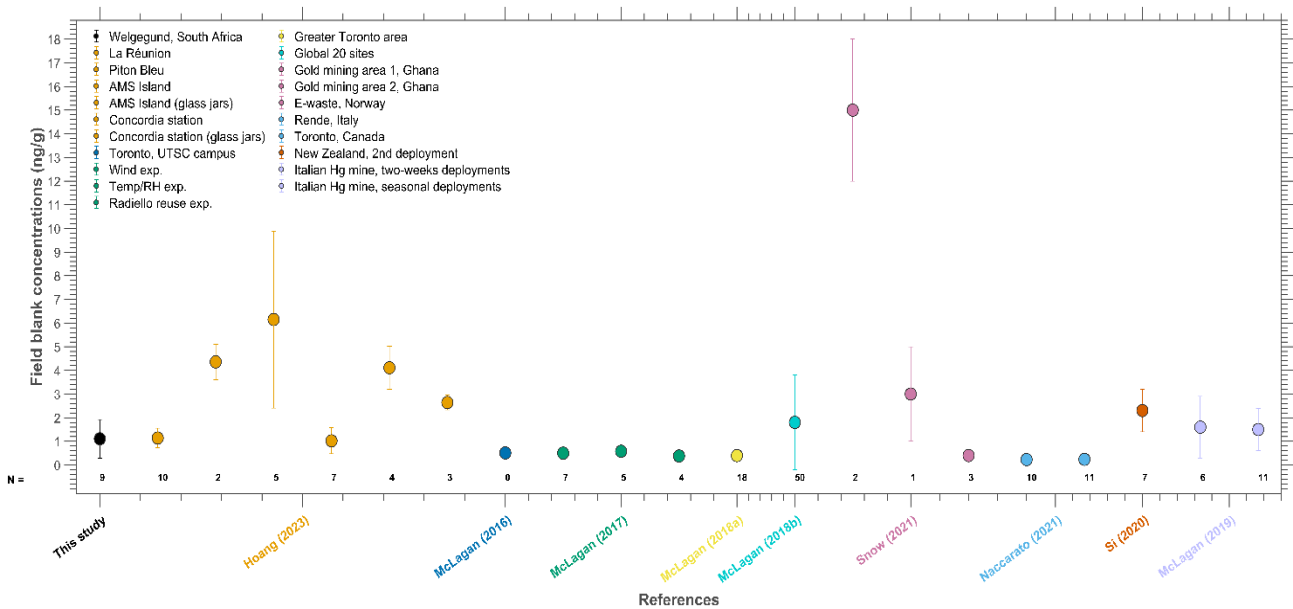

Figure S2 Errorbar plot (mean±SD) comparing field blank concentrations determined in different studies utilizing mercury passive samplers. The number (N) of blanks deployed during each study is indicated at the bottom

## ARTICLE

Table S1: Analytical detail on the passive air samplers deployed at Welgegund

| Month  | Deployment days | T (°C) | WS (m/s) | m c (g)      | mc-avg (g) | mHg (ng)      | mHg-avg (ng) | ng/g  | Blank      | Blank corrected (ng) | Uptake rate (ng/day) | Calculated SR (m <sup>3</sup> /day) | Active conc. X days | Temp./wind speed adjusted SR (m <sup>3</sup> /day) |
|--------|-----------------|--------|----------|--------------|------------|---------------|--------------|-------|------------|----------------------|----------------------|-------------------------------------|---------------------|----------------------------------------------------|
| Jun-21 | 29.04           | 11.21  | 2.70     | 0.60<br>0.62 | 0.61       | 5.36<br>7.68  | 6.52         | 10.72 | 13%<br>10% | 5.78                 | 0.199                | 0.109                               | 52.824              | 0.127                                              |
| Jul-21 | 28.10           | 9.49   | 2.72     | 0.63<br>0.60 | 0.62       | 11.48<br>9.34 | 10.41        | 16.83 | 7%<br>8%   | 9.67                 | 0.344                | 0.143                               | 67.394              | 0.125                                              |
| Aug-21 | 34.93           | 13.37  | 4.00     | 0.62<br>0.60 | 0.61       | 10.52<br>8.84 | 9.68         | 15.89 | 7%<br>8%   | 8.94                 | 0.256                | 0.155                               | 57.627              | 0.133                                              |
| Sep-21 | 27.90           | 18.02  | 4.95     | 0.62<br>0.58 | 0.60       | 8.33<br>4.93  | 6.63         | 11.05 | 9%<br>14%  | 5.90                 | 0.212                | 0.160                               | 36.805              | 0.140                                              |
| Oct-21 | 30.06           | 17.88  | 5.00     | 0.59<br>0.62 | 0.61       | 5.54<br>8.65  | 7.09         | 11.70 | 13%<br>9%  | 6.36                 | 0.212                | 0.150                               | 42.383              | 0.140                                              |
| Nov-21 | 32.90           | 21.49  | 5.19     | 0.61<br>0.62 | 0.61       | 6.72<br>10.43 | 8.58         | 13.99 | 11%<br>7%  | 7.84                 | 0.238                | 0.150                               | 52.337              | 0.144                                              |
| Dec-21 | 35.24           | 29.49  | 4.54     | 0.51<br>0.54 | 0.52       | 5.71<br>7.04  | 6.37         | 12.17 | 11%<br>9%  | 5.74                 | 0.163                | 0.122                               | 46.973              | 0.149                                              |

## ARTICLE

## Journal Name

Table S1: *Continued*

|        |       |       |      |              |      |              |      |       |            |      |       |       |        |       |
|--------|-------|-------|------|--------------|------|--------------|------|-------|------------|------|-------|-------|--------|-------|
| Jan-22 | 27.83 | 20.66 | 3.44 | 0.56<br>0.53 | 0.54 | 5.96<br>6.23 | 6.09 | 11.18 | 11%<br>10% | 5.43 | 0.195 | 0.112 | 48.586 | 0.138 |
| Feb-22 | 28.94 | 21.73 | 3.21 | 0.58<br>0.56 | 0.57 | 6.12<br>5.78 | 5.95 | 10.49 | 11%<br>12% | 5.26 | 0.182 | 0.119 | 44.194 | 0.138 |
| Mar-22 | 27.02 | 18.95 | 2.88 | 0.57<br>0.57 | 0.57 | 7.13<br>7.20 | 7.17 | 12.60 | 10%<br>10% | 6.48 | 0.240 | 0.125 | 51.776 | 0.134 |
| Apr-22 | 35.09 | 15.36 | 3.07 | 0.49<br>0.53 | 0.51 | 6.98<br>7.64 | 7.31 | 14.29 | 8%<br>8%   | 6.69 | 0.191 | 0.116 | 57.450 | 0.132 |
| May-22 | 27.98 | 14.43 | 2.81 | 0.55<br>0.50 | 0.53 | 7.24<br>6.73 | 6.99 | 13.31 | 9%<br>9%   | 6.35 | 0.227 | 0.112 | 56.568 | 0.130 |
| Jun-22 | 34.99 | 11.23 | 3.15 | 0.59<br>0.60 | 0.59 | 8.20<br>7.62 | 7.91 | 13.29 | 9%<br>10%  | 7.19 | 0.205 | 0.116 | 61.870 | 0.128 |
| Jul-22 | 28.03 | 12.49 | 3.42 | 0.61<br>0.61 | 0.61 | 5.57<br>6.43 | 6.00 | 9.83  | 13%<br>11% | 5.26 | 0.188 | 0.106 | 49.730 | 0.130 |
| Aug-22 | 34.95 | 15.02 | 3.91 | 0.60<br>0.59 | 0.60 | 7.72<br>7.68 | 7.70 | 12.93 | 9%<br>9%   | 6.98 | 0.200 | 0.132 | 53.015 | 0.134 |

## ARTICLE

Table S2: Guidelines for interpreting the  $\rho$ ,  $r$ ,  $p$ -value and  $\epsilon^2$ 

| Spearman correlation coefficient ( $\rho$ ) and $r$                                        |                                 | Interpretation                                                                                                         |
|--------------------------------------------------------------------------------------------|---------------------------------|------------------------------------------------------------------------------------------------------------------------|
| 0.50 to 1.00                                                                               | - 0.50 to -1.00                 | strong/significant                                                                                                     |
| 0.50 to 0.30                                                                               | - 0.50 to -0.30                 | moderate/less significant                                                                                              |
| 0 to 0.30                                                                                  | 0 to -0.30                      | weak/insignificant                                                                                                     |
| Ranges to approximately translate the $p$ -value into the language of statistical evidence |                                 | Reference                                                                                                              |
| Little or no statistical evidence                                                          | $p$ -value $\geq 0.1$           | 1. J. Cohen, Statistical power analysis, <i>Current directions in psychological science</i> , 1992, <b>1</b> , 98-101. |
| Weak statistical evidence                                                                  | $0.05 \leq p$ -value $< 0.1$    |                                                                                                                        |
| Statistical evidence                                                                       | $0.01 \leq p$ -value $< 0.05$   |                                                                                                                        |
| Strong Statistical evidence                                                                | $0.001 \leq p$ -value $< 0.01$  |                                                                                                                        |
| Very strong statistical evidence                                                           | $p$ -value $< 0.001$            |                                                                                                                        |
| Assessment of group effect size using $\epsilon^2$                                         |                                 |                                                                                                                        |
| small                                                                                      | $0.01 \leq \epsilon^2 < 0.059$  |                                                                                                                        |
| moderate                                                                                   | $0.060 \leq \epsilon^2 < 0.139$ |                                                                                                                        |
| large                                                                                      | $\epsilon^2 \geq 0.14$          |                                                                                                                        |
